# Supplementary material
Source: PubMed Central journal article supplement (PMC4681062)
Supplement: vir-96-08-2079-s001.pdf [file vir-96-08-2079-s001.pdf]

Fig S1 (A)

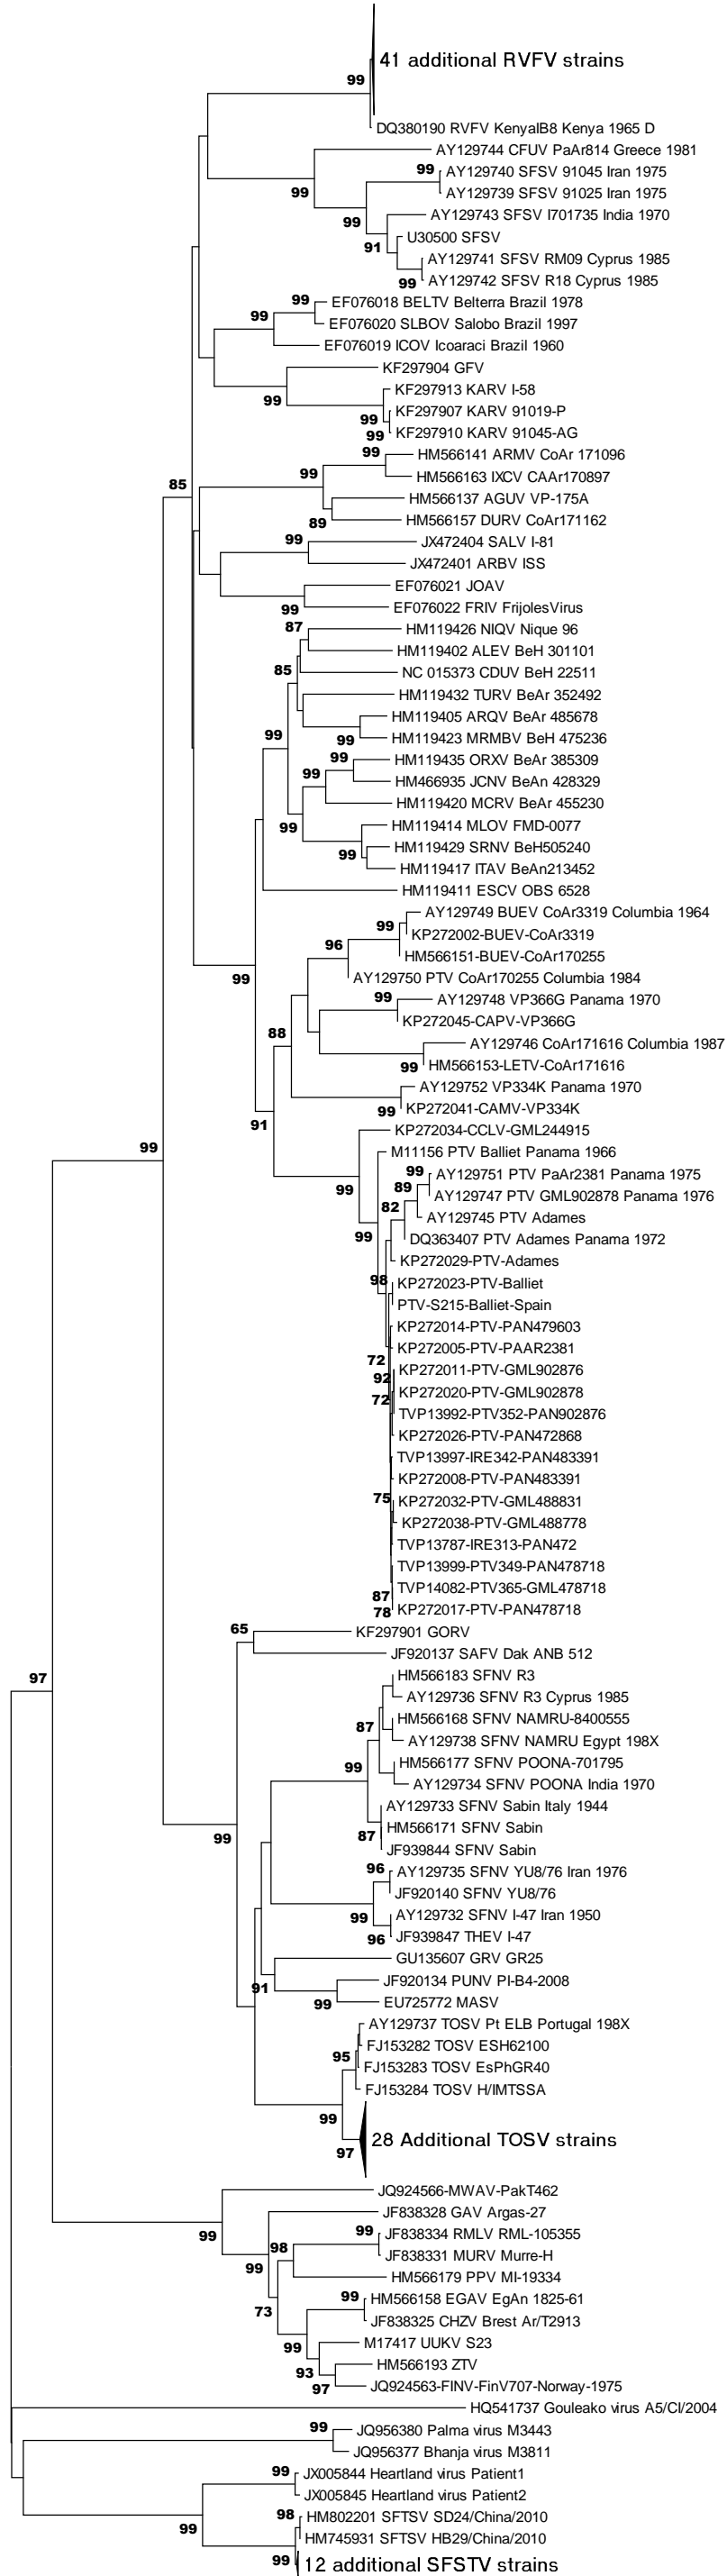

Fig S1 (B)

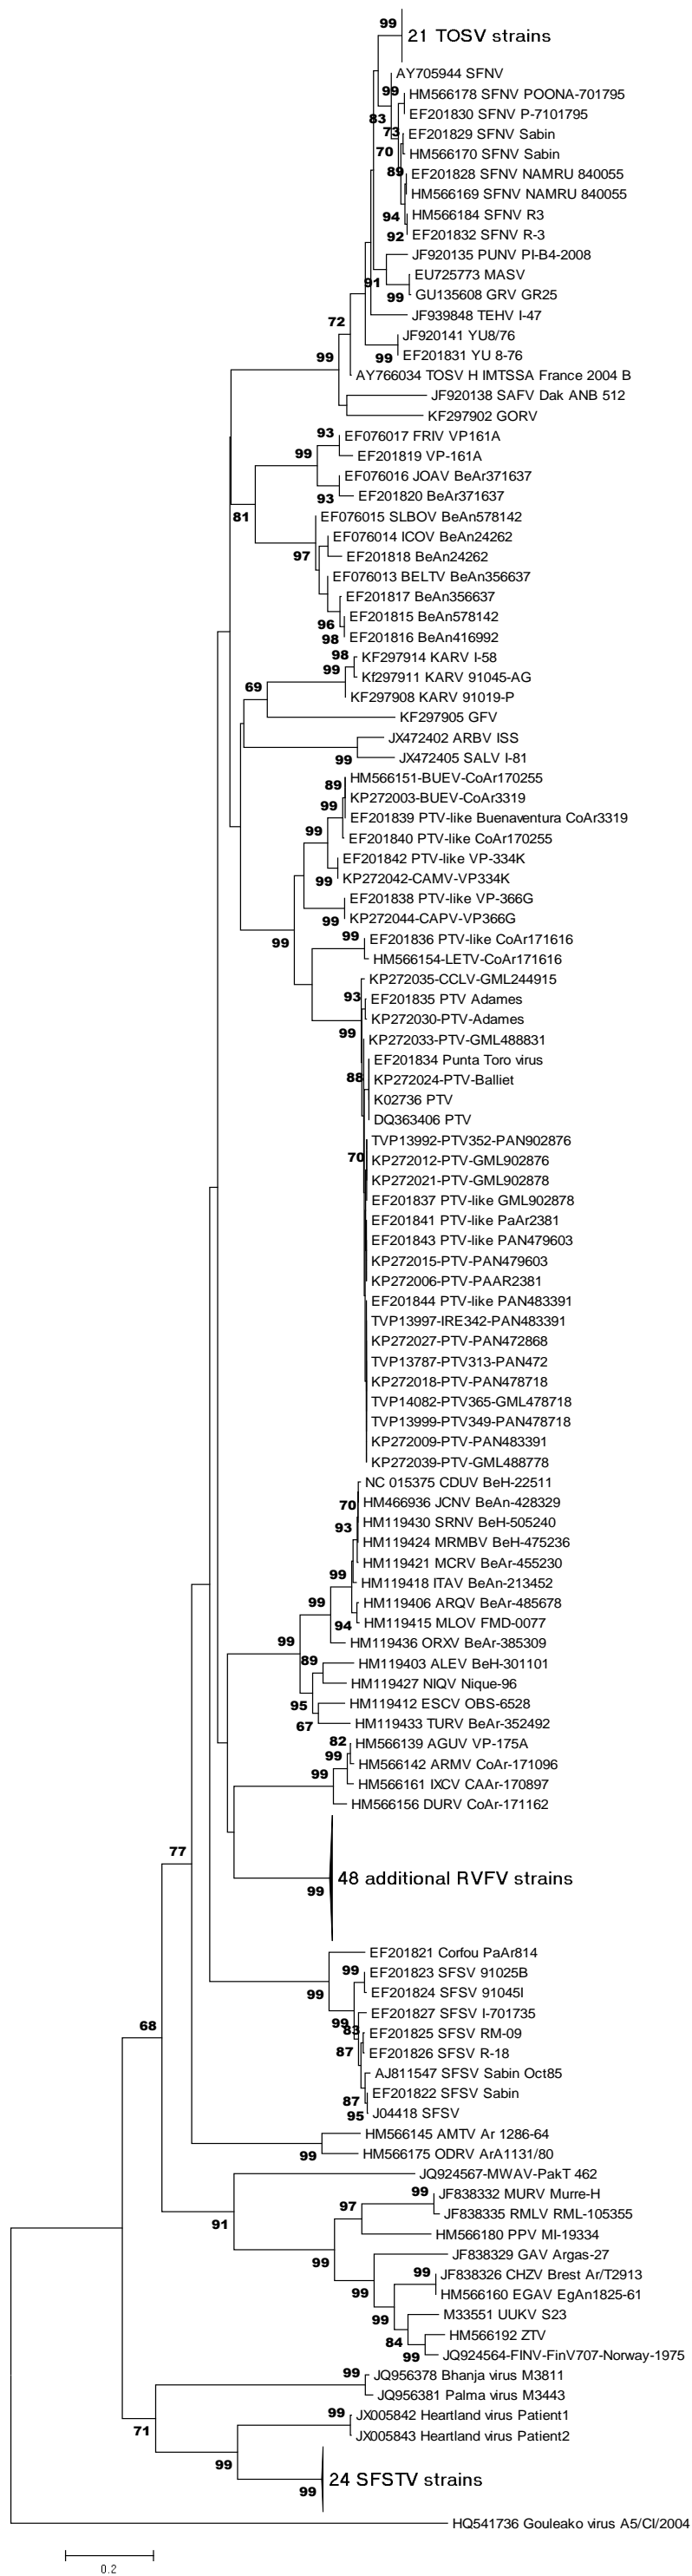

Fig S1 (C)

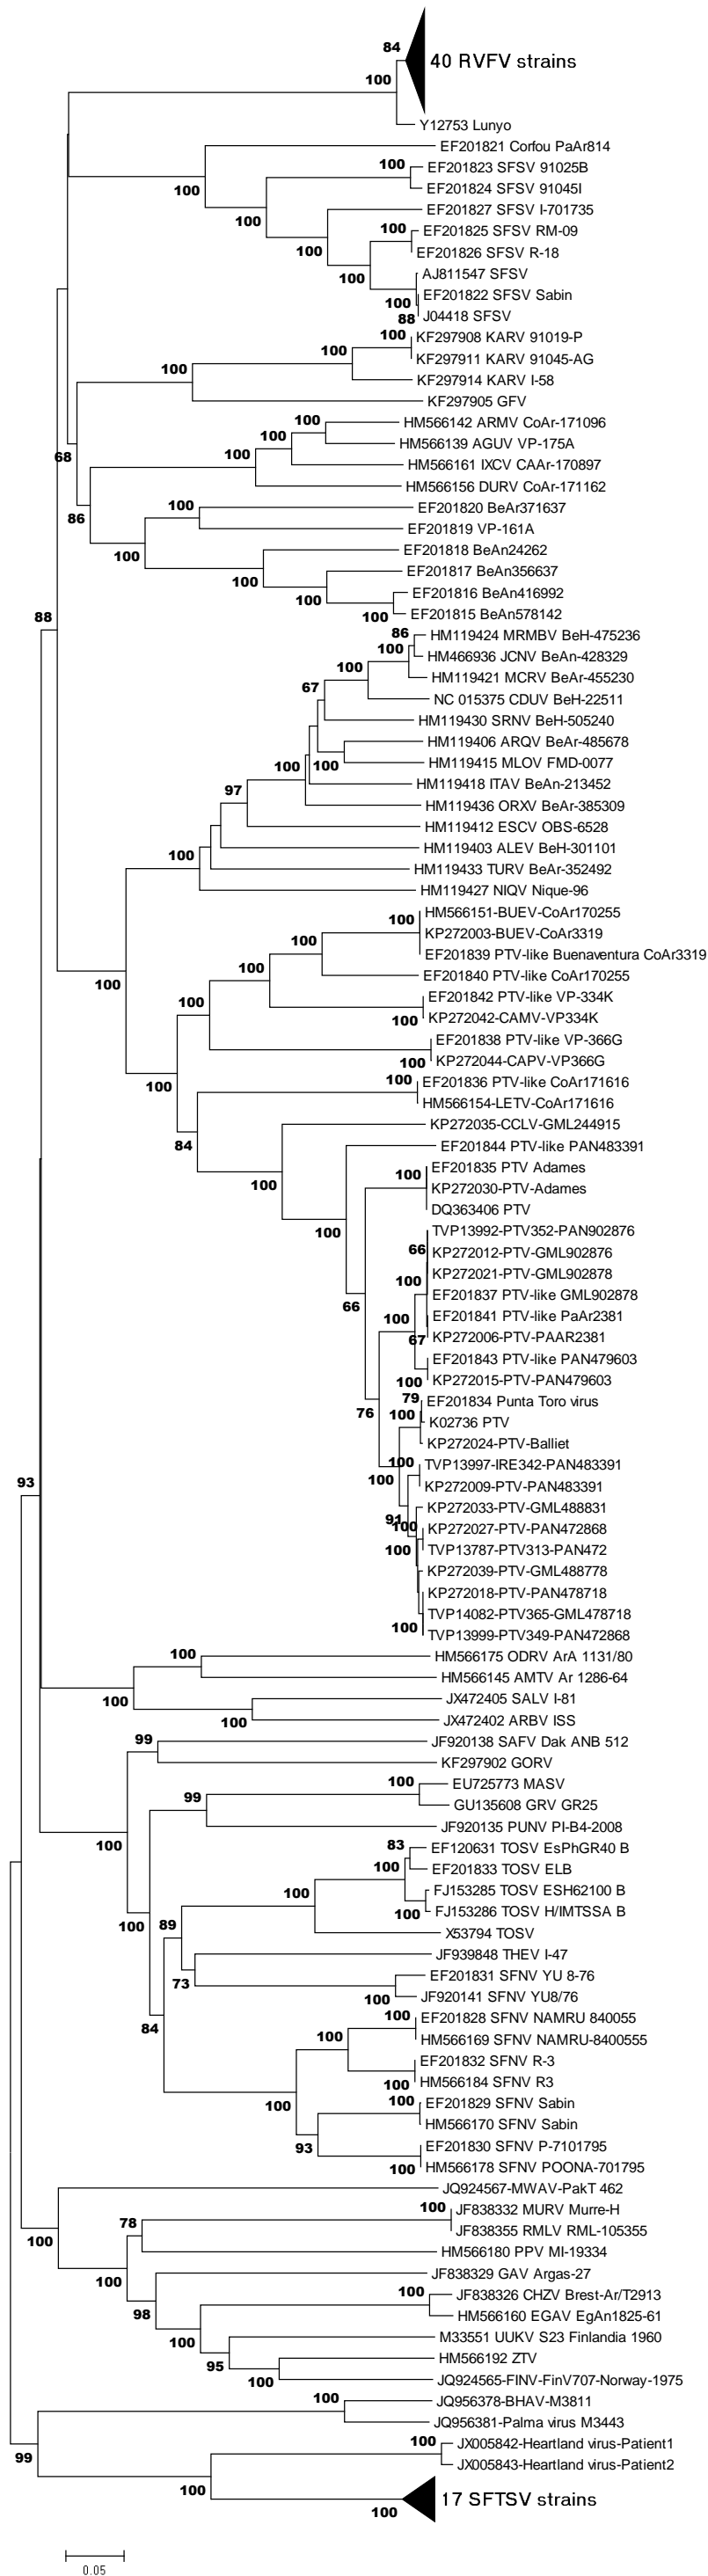

Fig S2

A

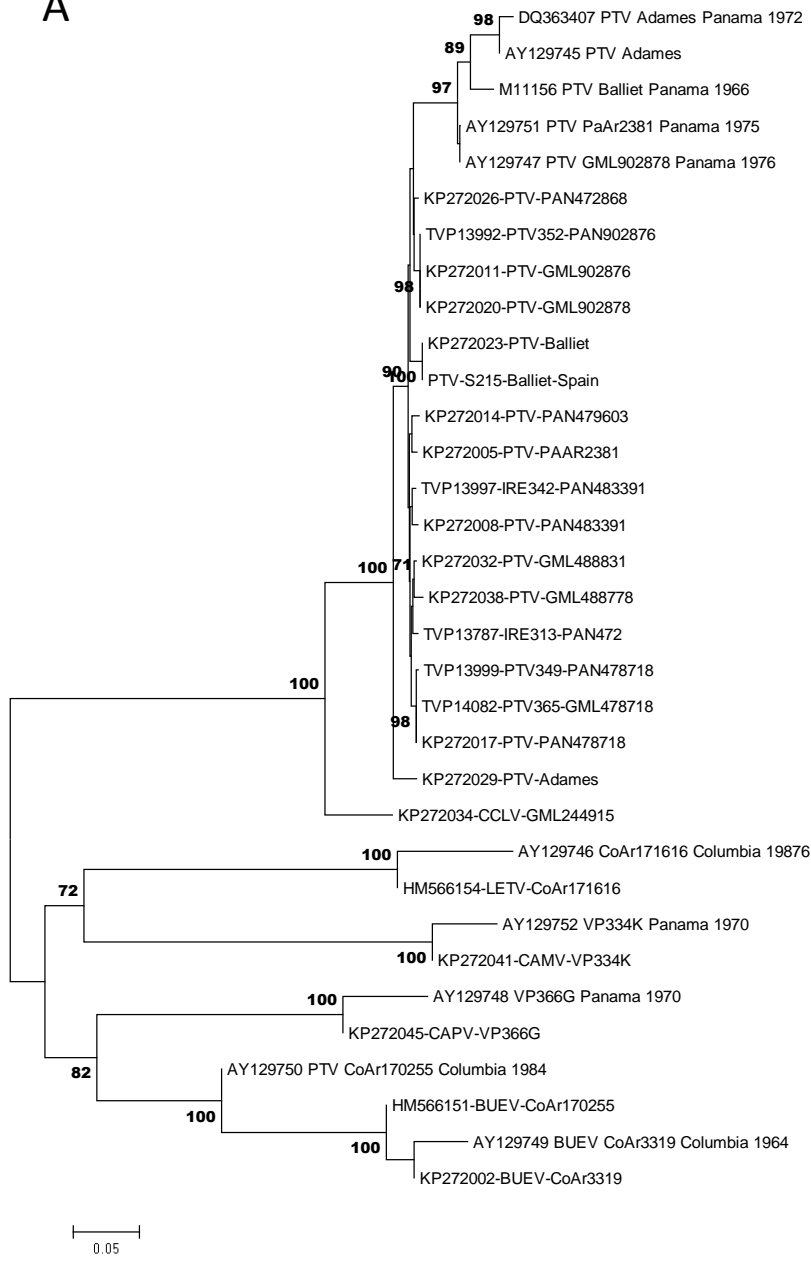

B

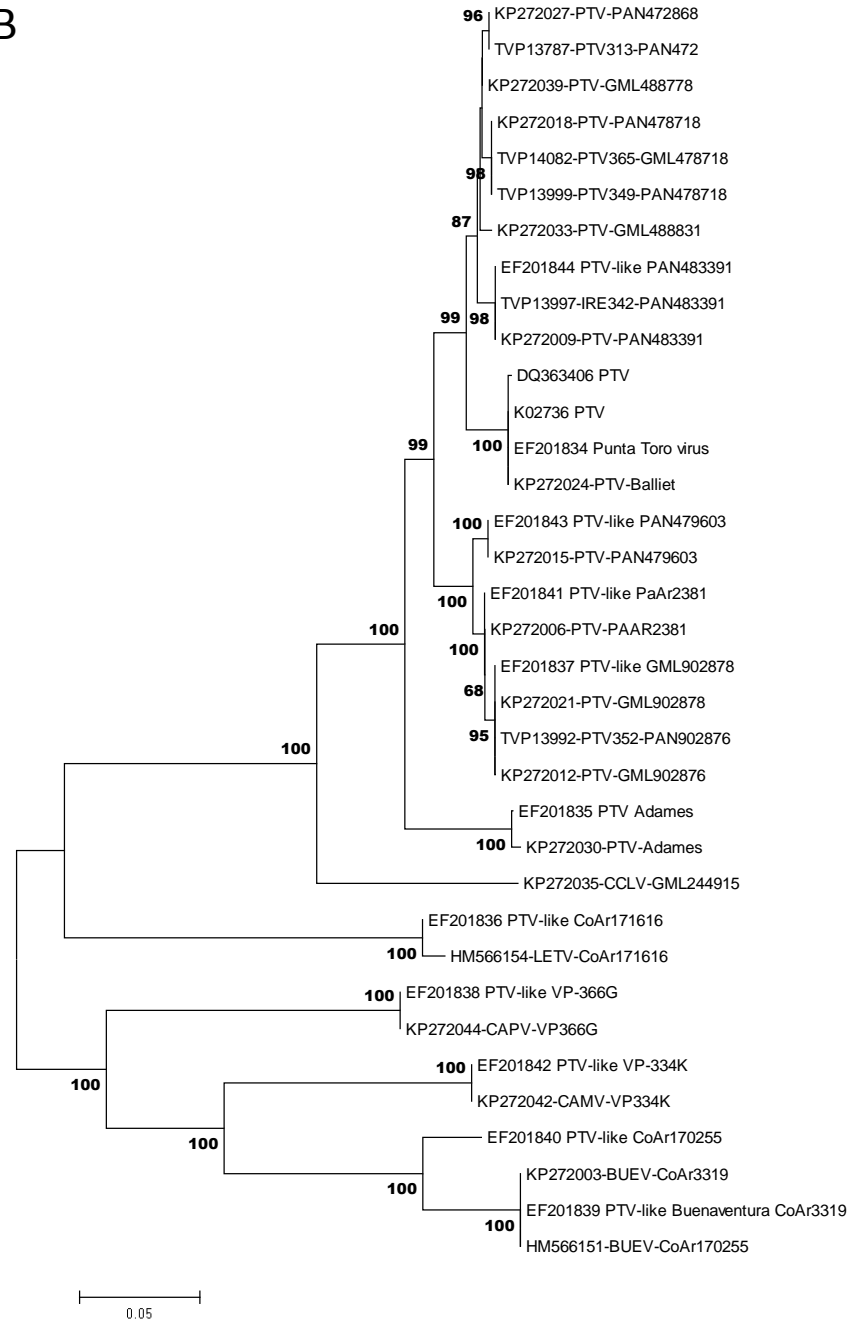

C

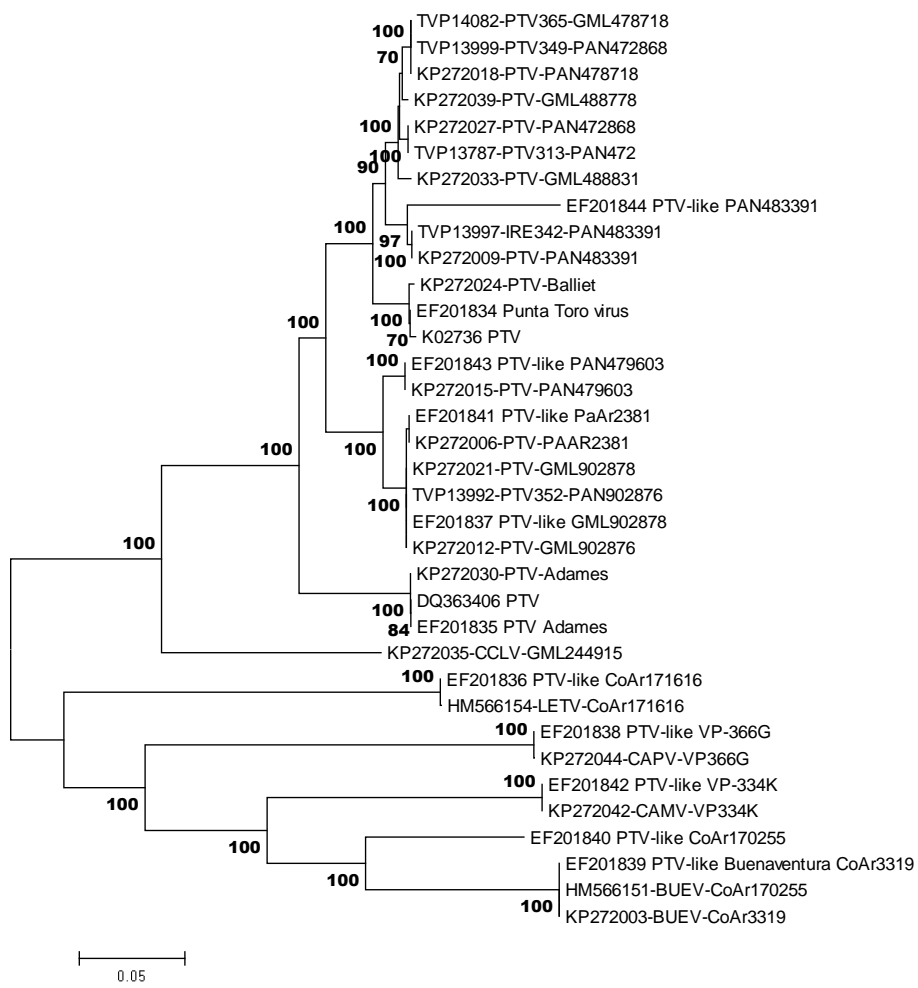

## **Supplementary Figure Legends**

**Fig S1 (A-C). Phylogenetic analysis of the available sequences of phlebovirus (a) M, (b) N, and (c) NSs ORF.** Sequences marked with red dots (Punta Toro species complex) corresponded to sequenced obtained during this work. The evolutionary history was inferred using the Neighbor-Joining method.

**Fig S2 (A-C). Phylogenetic analysis of all members of the Punta Toro species complex (a) M, (b) N, and (c) NSs ORF.** The evolutionary history was inferred using the Neighbor-Joining method.
